# Supplementary material for: Clinical implementation of magnetic resonance imaging guided adaptive radiotherapy for localized prostate cancer
Source: PubMed Central journal article supplement — Phys Imaging Radiat Oncol. 2019 Mar 6;9:69–76. doi: 10.1016/j.phro.2019.02.002 (PMC7807673; doi:10.1016/j.phro.2019.02.002), 2019-03-06
Supplement: mmc1.pdf [file mmc1.pdf]

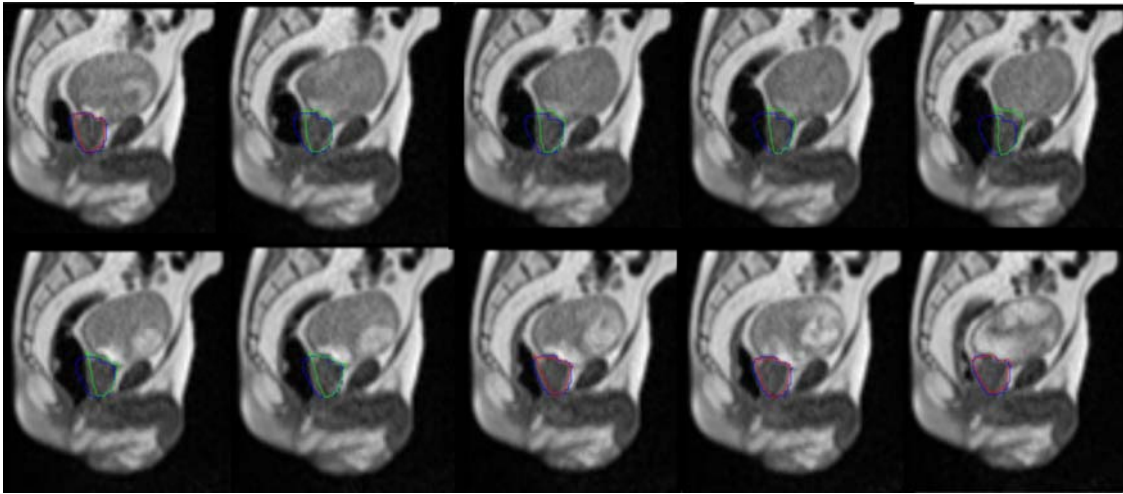

Figure S1. Real-time variability of position in CTV and rectal filling during MRgRT for a prostate cancer patient. CTV contour is shown in green when more than 7% is outside of the gating boundary (PTV in blue) triggering thereby a beam-hold. CTV contour in red means the target is inside the boundary within the preset value (>93%) and beam is on. Frame rate during acquisition is 4fps.
